# Supplementary material for: Multi-trace element sea surface temperature coral reconstruction for the southern Mozambique Channel reveals teleconnections with the tropical Atlantic
Source: Copernicus journal article supplement (doi:10.5194/bg-2018-441), 2018-10-16
Supplement: Supplementary file 1 [file bg-2018-441-supplement.pdf]

1 **Supplementary Figures**  
2

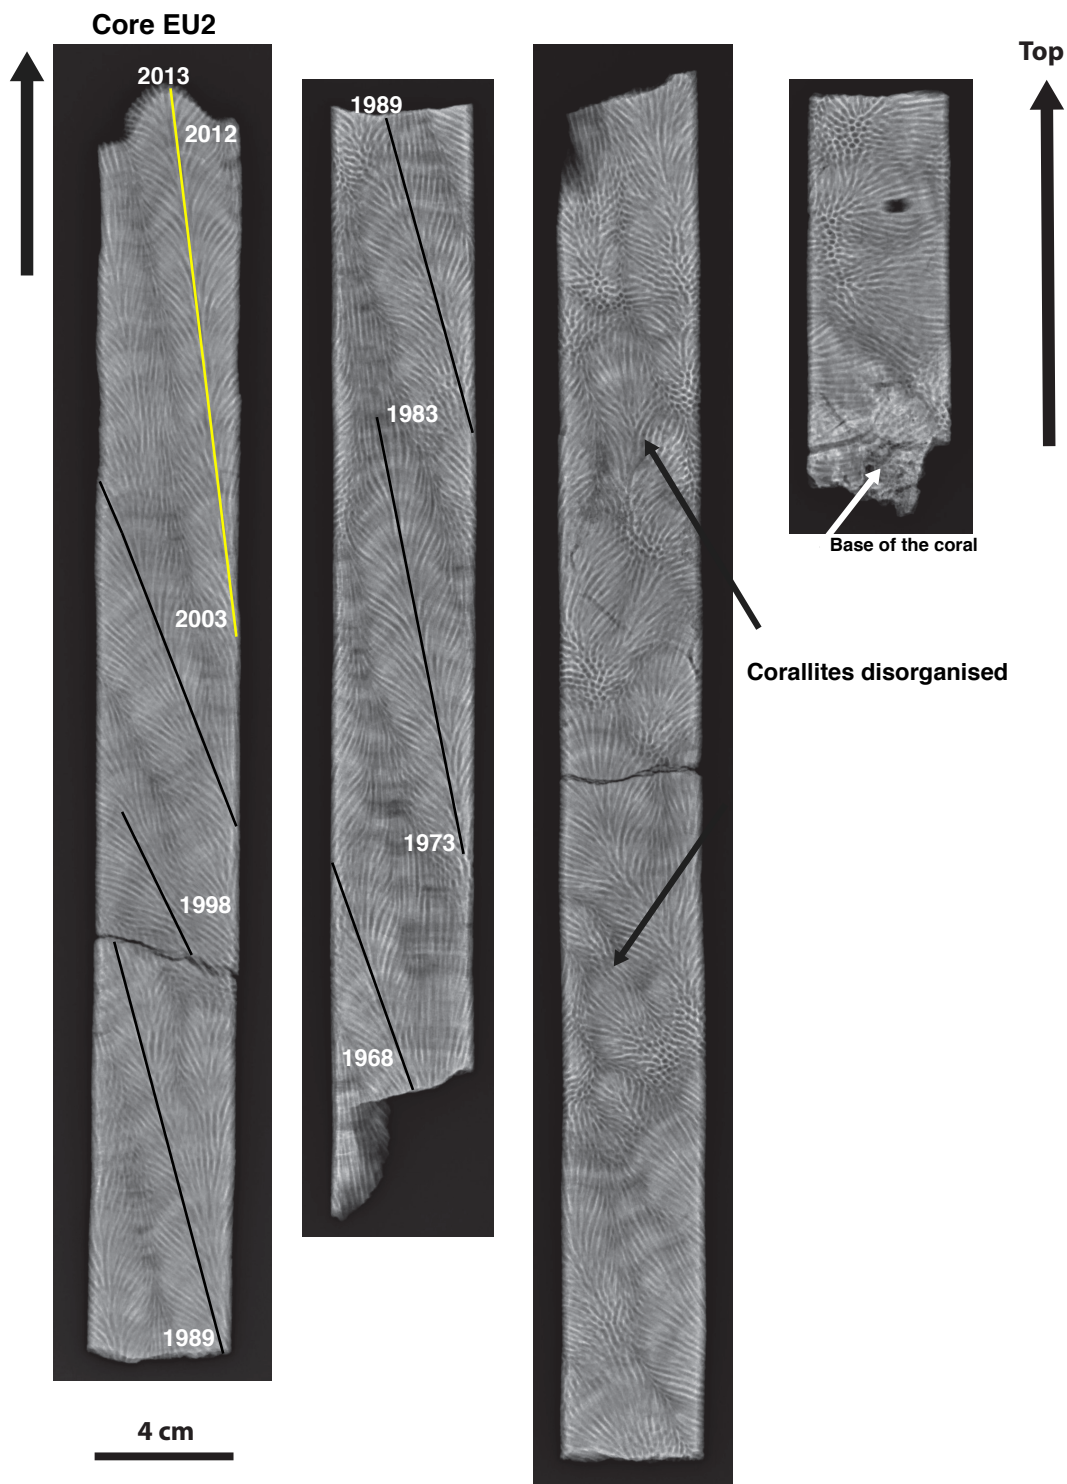

3  
4 Figure S1 - X-ray of core EU2 with sampling tracks indicated. Coral growth  
5 parameters were measured up to 1968, while geochemical proxies were measured  
6 between 2003 and 2013 (yellow line).  
7

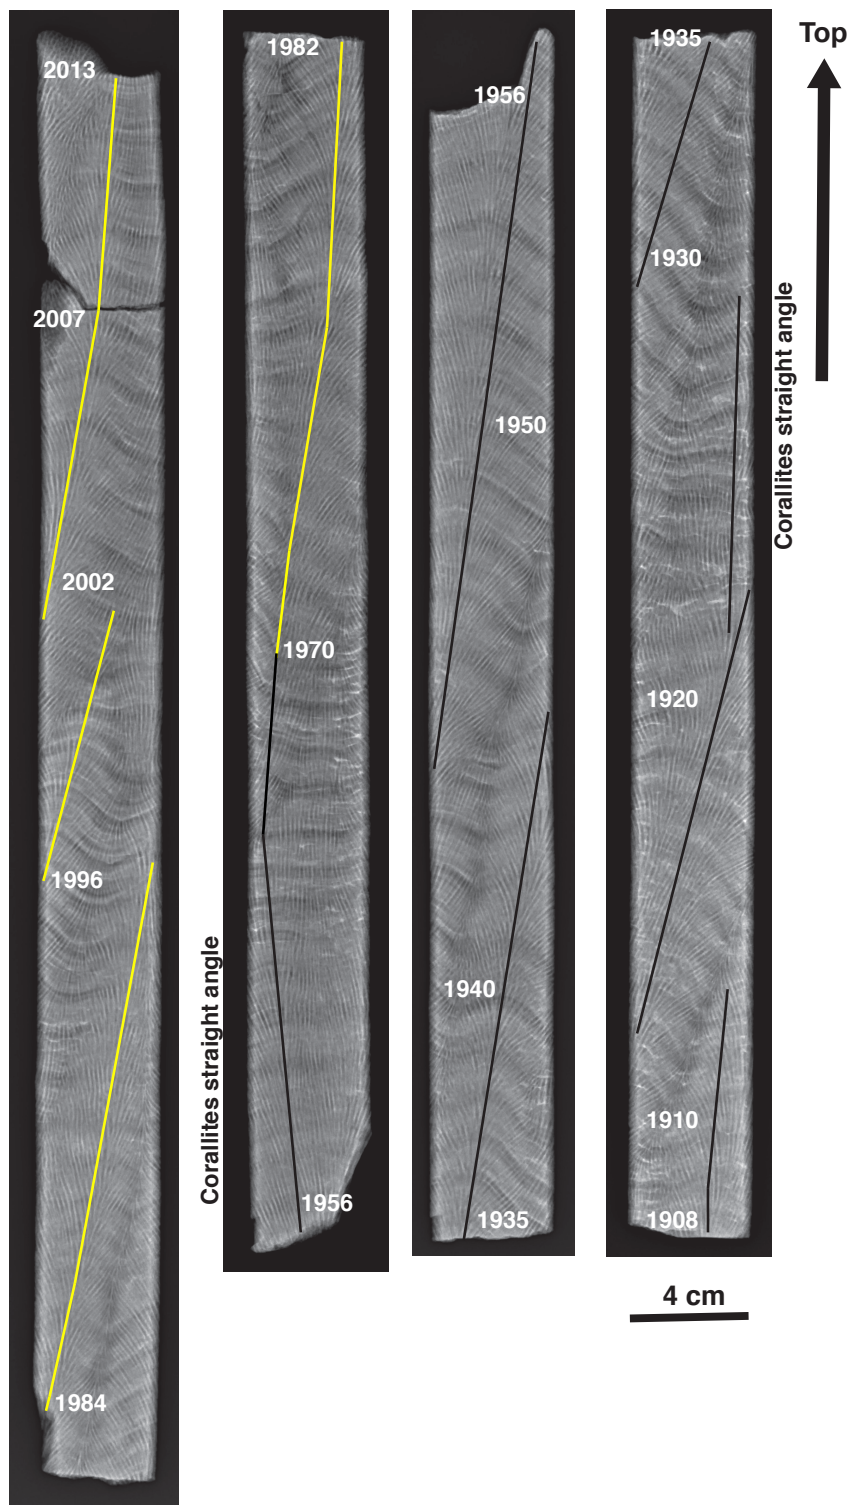

8  
 9 Figure S2 - X-ray of core EU3 with sampling tracks indicated. Coral growth  
 10 parameters were measured up to 1911, while geochemical proxies were analysed  
 11 between 1970 and 2013 (yellow line).  
 12  
 13  
 14

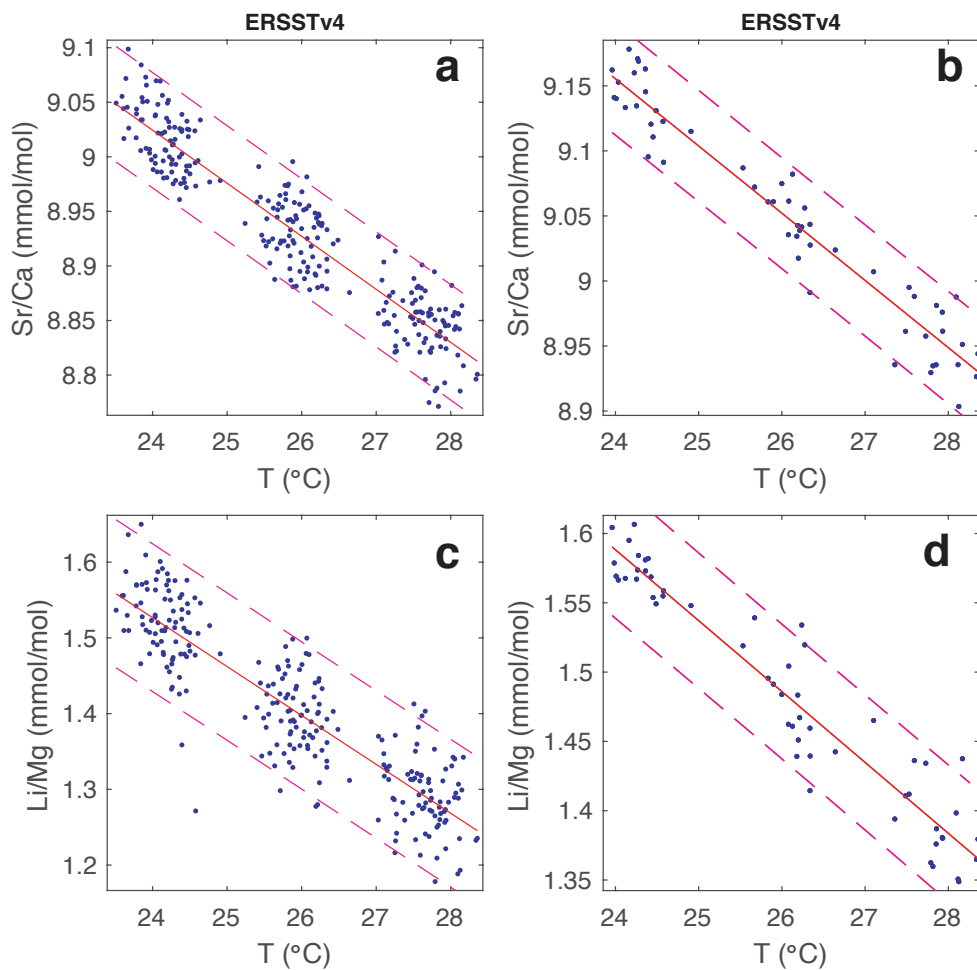

15  
 16 Figure S3 - Linear regressions of trace element (TE)/Ca proxies with ERSSTv4 for  
 17 core EU3 (a,c) and EU2 (b,d). The TE/Ca records were calibrated using the respective  
 18 linear regression equations of the bimonthly correlations obtained for each of the core  
 19 records from the two sites. The 95% confidence intervals of the regressions are  
 20 indicated. Regression equations are provided in Table 2.

21

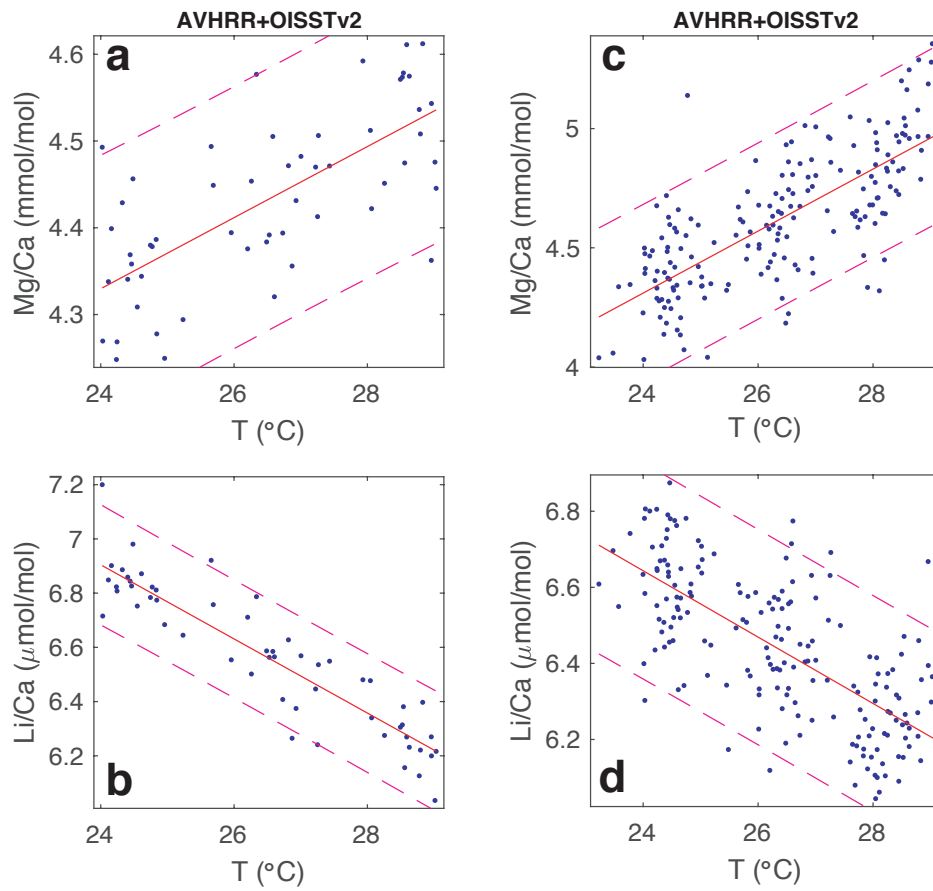

22

23 Figure S4 - Linear regressions of Mg/Ca and Li/Ca with AVHRR-OI SSTv2 for core  
 24 EU2 (a,b) between 2003-2012 and EU3 (c,d) between 1981 and 2012. The TE/Ca  
 25 records were calibrated using the respective linear regression equations of the  
 26 bimonthly correlations obtained for each of the core records from the two sites. The  
 27 95% confidence intervals of the regressions are indicated. Regression equations are  
 28 provided in Supplementary Table 1.

29

30

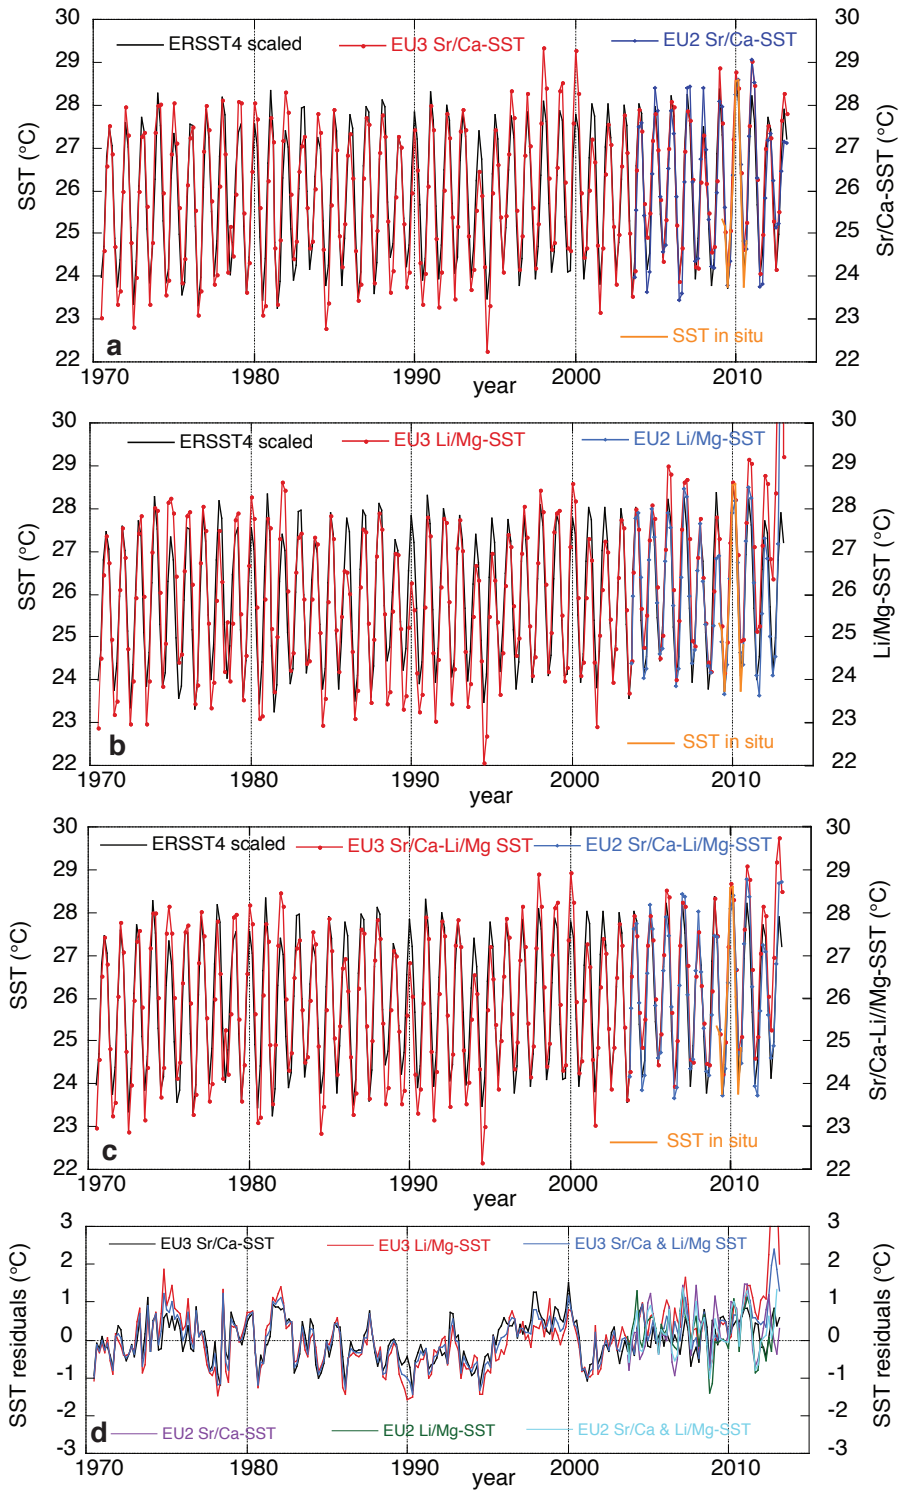

31

32

33 Figure S5 - Absolute SST reconstructions for cores EU2 (blue) and EU3 (red) with

34 SST residuals based on the calibration period 1981 to 2013 for a) Sr/Ca-SST, b)

35 Li/Mg-SST and c) their combination in comparison to ERSSTv4 (black) scaled to *in*

36 *situ* SST (orange; 2009-2010).

37



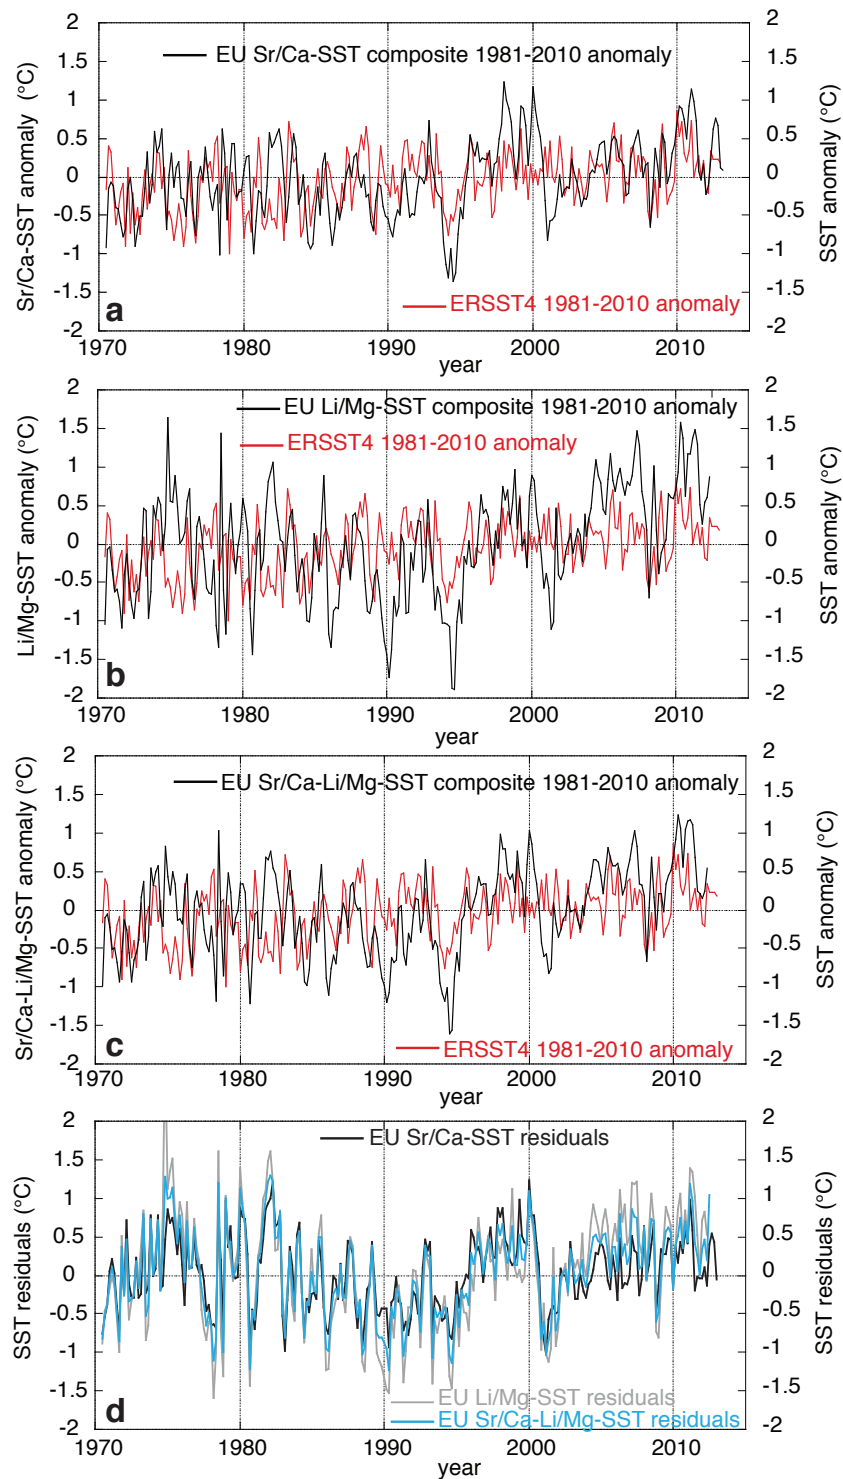

38

39 Figure S6 - SST anomaly reconstructions with SST residuals to ERSSTv4 for a) EU  
 40 composite Sr/Ca, b) EU composite Li/Mg and 3) EU composite Sr/Ca and Li/Mg-SST  
 41 combined. Anomalies were calculated relative to the 1981 to 2010 average bimonthly  
 42 seasonal cycle.

43

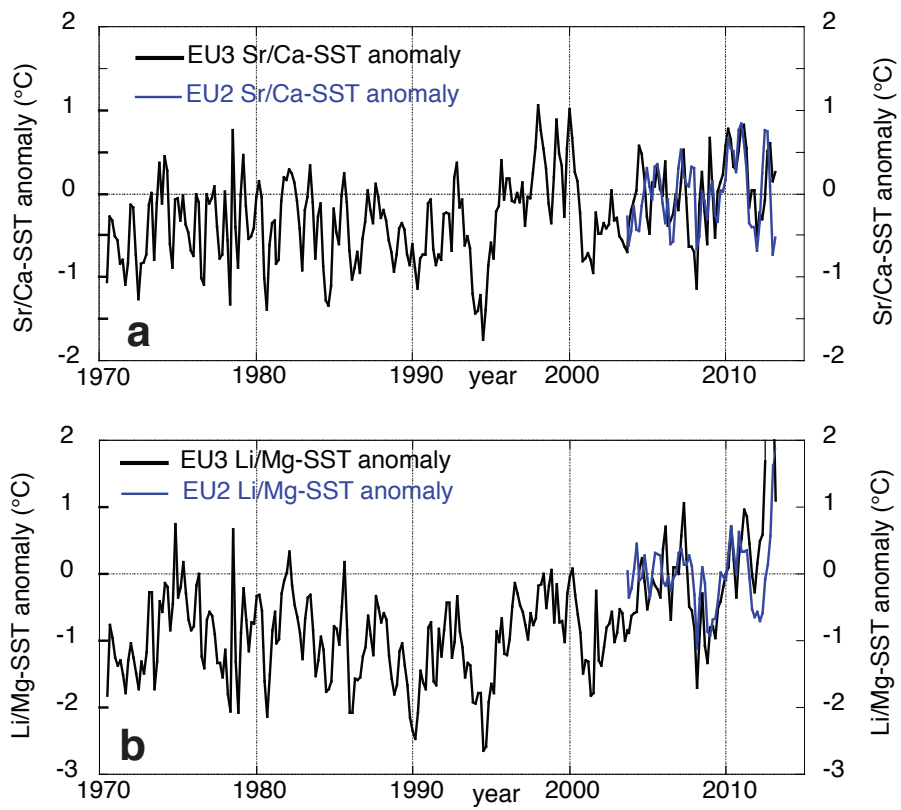

44

45 Figure S7 – SST anomaly reconstructions for a) EU3 and EU2 Sr/Ca and b) EU3 and  
 46 EU2 Li/Mg. Anomalies were calculated relative to the 2003 to 2013 average bimonthly  
 47 seasonal cycle where both cores overlap.

48

49

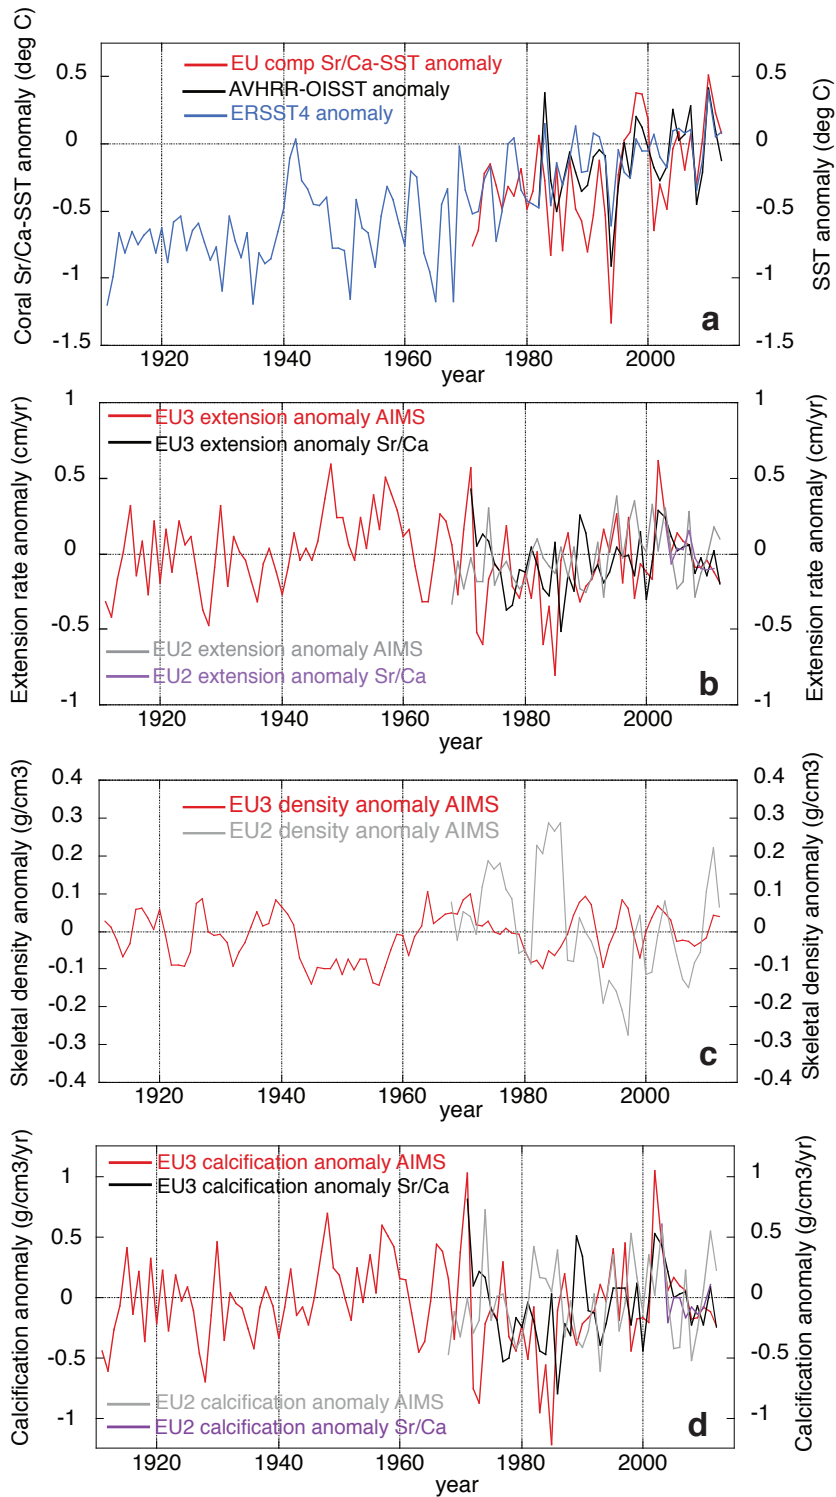

50

51

52 Figure S8 - Mean annual coral growth parameters of cores EU2 and EU3 compared to  
 53 coral composite Sr/Ca-SST reconstruction, AVHRR-OISSTv2 and ERSSTv4. a) SST  
 54 time series, b) linear extension rate, c) skeletal density and d) calcification rate.



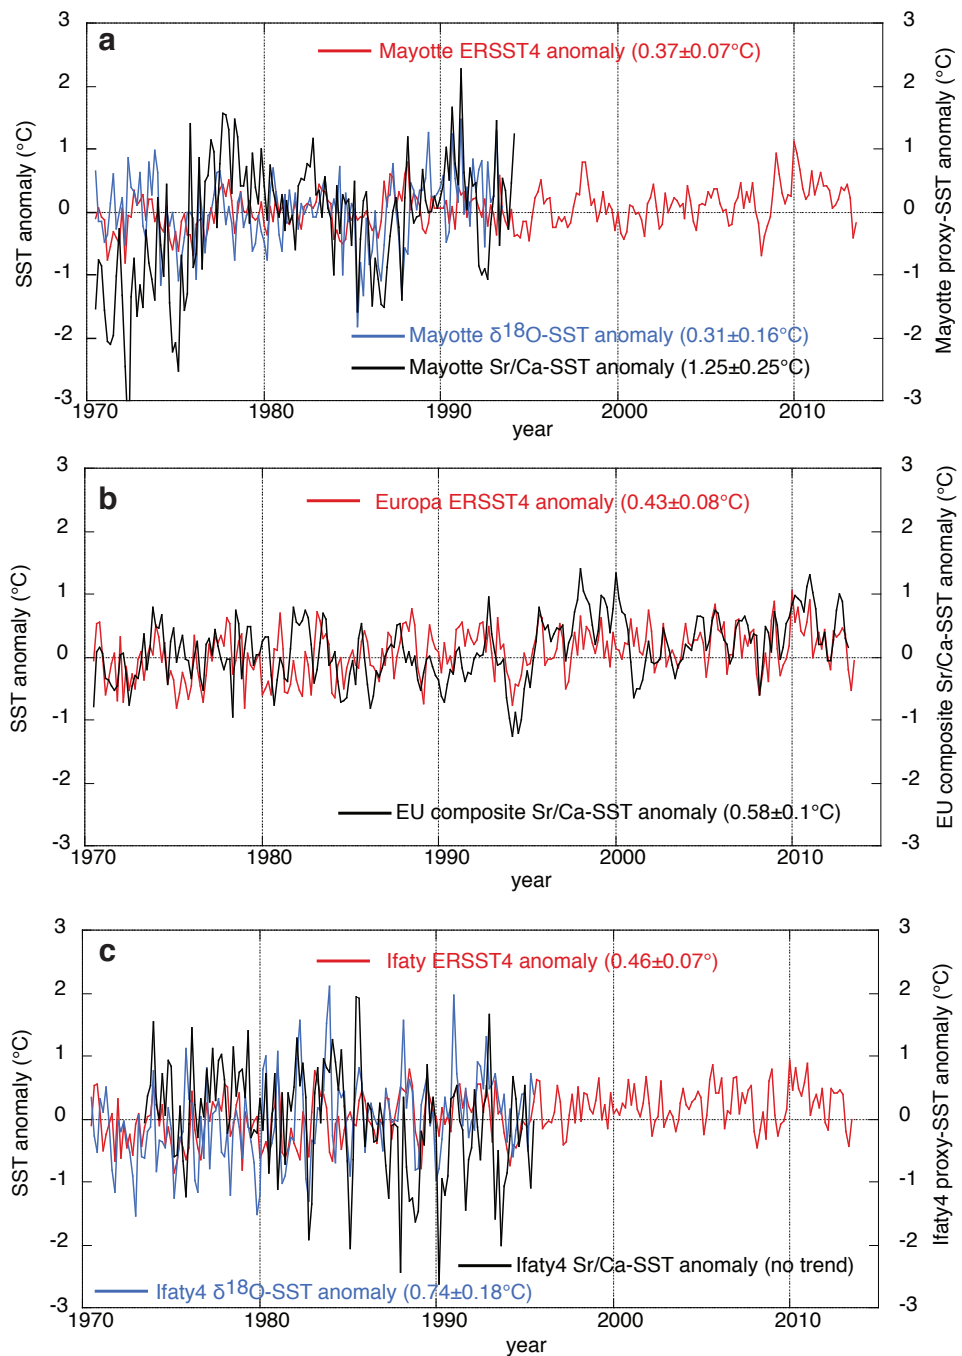

55  
56

57 Figure S9 - Regional comparison of Mozambique Channel ERSSTv4 anomalies (red  
58 line) and coral proxy-derived SST anomalies (Sr/Ca= black line;  $\delta^{18}\text{O}$ = blue line)  
59 between 1970 and 2013 for a) Mayotte Island, Comoros b) Europa and c) Ifaty Reef,  
60 southwest Madagascar. Anomalies calculated relative to 1973-1993 period. Linear  
61 warming trends indicated in brackets for ERSSTv4 (1970-2013) and proxy-SST for  
62 individual record length. Proxy data taken from Zinke et al. (2004, 2008).

63

| core | proxy           | slope  | Conf. interval | intercept | Conf. interval | r <sup>2</sup> | r <sup>2</sup> adj. | SSE   | RMSE  | DF  |
|------|-----------------|--------|----------------|-----------|----------------|----------------|---------------------|-------|-------|-----|
| EU2  | Sr/Ca vs Li/Mg  | 0.964  | 0.079          | -7.244    | 0.720          | 0.91           | 0.91                | 0.040 | 0.027 | 54  |
|      | Sr/Ca vs. Mg/Ca | -1.028 | 0.236          | 13.735    | 2.138          | 0.60           | 0.60                | 0.354 | 0.081 | 54  |
|      | Sr/Ca vs. Li/Ca | 2.730  | 0.381          | -18.155   | 3.452          | 0.82           | 0.82                | 0.924 | 0.130 | 54  |
|      | Li/Mg vs Mg/Ca  | -1.089 | 0.217          | 6.040     | 0.322          | 0.67           | 0.66                | 0.299 | 0.074 | 54  |
|      | Li/Mg vs Li/Ca  | 2.803  | 0.324          | 2.393     | 0.480          | 0.87           | 0.87                | 0.665 | 0.111 | 54  |
| EU3  | Li/Ca vs Mg/Ca  | -1.341 | 0.530          | 12.481    | 2.356          | 0.34           | 0.32                | 3.429 | 0.252 | 54  |
|      | Sr/Ca vs Li/Mg  | 1.350  | 0.047          | -10.658   | 0.419          | 0.92           | 0.92                | 0.286 | 0.033 | 259 |
|      | Sr/Ca vs. Mg/Ca | -3.117 | 0.213          | 32.424    | 1.909          | 0.76           | 0.76                | 5.931 | 0.151 | 259 |
|      | Sr/Ca vs. Li/Ca | 1.730  | 0.239          | -9.053    | 2.136          | 0.41           | 0.41                | 7.429 | 0.169 | 259 |
|      | Li/Mg vs Mg/Ca  | -2.355 | 0.125          | 7.891     | 0.176          | 0.84           | 0.84                | 4.027 | 0.124 | 259 |
|      | Li/Mg vs Li/Ca  | 1.233  | 0.172          | 4.668     | 0.242          | 0.40           | 0.40                | 7.564 | 0.171 | 259 |
|      | Li/Ca vs Mg/Ca  | -0.259 | 0.085          | 7.588     | 0.392          | 0.03           | 0.03                | 12.25 | 0.217 | 259 |

64

65 Table S1 - Linear optimal least squares regression equations for core EU2 and EU3  
66 trace element ratios. Conf. interval= 95% confidence interval of the regression slopes  
67 and intercepts; r<sup>2</sup> adj.= r<sup>2</sup> adjusted; SSE= Standard Error; RMSE= Root Mean Square  
68 Error; DF= degrees of freedom.

69
